# Supplementary material for: Oral Microbial Signatures of Tobacco Chewers and Oral Cancer Patients in India
Source: MDPI journal article supplement (doi:10.3390/pathogens12010078), 2023-01-03
Supplement: s1 [file s1]

**Table S1:** Clinical characteristics of participants

| Gender distribution       |                                | Control | Tobacco<br>chewers | OC<br>patients |
|---------------------------|--------------------------------|---------|--------------------|----------------|
|                           | Male                           | 27      | 35                 | 35             |
|                           | Female                         | 13      | 5                  | 5              |
| Age distribution          |                                | 41 ± 10 | 43 ± 10            | 54 ± 11        |
| Lifestyle habits          | Tobacco chewing only           | NA      | 30                 | 16             |
|                           | Tobacco + Smoking              |         | 2                  | 2              |
|                           | Tobacco + Alcohol              |         | 6                  | 1              |
|                           | Tobacco + Smoking +<br>Alcohol |         | 2                  | 0              |
| Primary site of<br>cancer | Buccal mucosa                  | NA      |                    | 17             |
|                           | Tongue                         |         |                    | 9              |
|                           | Mandible                       |         |                    | 7              |
|                           | Retromolar trigone             |         |                    | 1              |
|                           | Lip                            |         |                    | 1              |
|                           | Floor of mouth                 |         |                    | 2              |
|                           | Maxilla                        |         |                    | 1              |
|                           | Gingiva                        |         |                    | 1              |
|                           | Alveolus                       |         |                    | 1              |
| Staging                   | Stage II                       | NA      |                    | 30             |
|                           | Stage III                      |         |                    | 10             |

NA: Not Applicable to Control and Tobacco chewers
